# Supplementary material
Source: PubMed Central journal article supplement (PMC5097692)
Supplement: NIHMS805335-supplement.pdf [file NIHMS805335-supplement.pdf]

**Supplemental Table 1. The average total weights of vital organs and normalized average weight of vital organs<sup>a</sup>**

| Normalized Organ weight | SUNDS (N=148) | Control (N=444) | <i>P</i> value |
|-------------------------|---------------|-----------------|----------------|
| TW (g)                  | 5262.6± 604.3 | 5108.6± 808.8   | .04            |
| Brain                   | 0.280±0.033   | 0.284±0.040     | .39            |
| Left lung               | 0.116±0.017   | 0.119±0.031     | .26            |
| Right lung              | 0.132±0.020   | 0.135±0.033     | .43            |
| Heart                   | 0.067±0.008   | 0.065±0.010     | .04            |
| Liver                   | 0.292±0.032   | 0.286±0.042     | .12            |
| Spleen                  | 0.033±0.012   | 0.033±0.016     | .80            |
| Left kidney             | 0.029±0.006   | 0.028±0.005     | .12            |
| Right kidney            | 0.028±0.005   | 0.027±0.006     | .43            |
| Pancreas                | 0.023±0.005   | 0.023±0.006     | .57            |

<sup>a</sup>TW = total weights (of vital organs including brain, lungs, heart, liver, spleen, kidneys, and pancreas).

**Supplemental Table 2. The prevalence of non-significant microscopic findings<sup>a</sup>**

| Morphological changes                    | SUNDS<br>(N=148)<br>n (%) | Control<br>(N=444)<br>n (%) | <i>P</i> value | OR (95% CI)        | comments                                |
|------------------------------------------|---------------------------|-----------------------------|----------------|--------------------|-----------------------------------------|
| Myocardium: few lymphocytic infiltration | 10 (6.76)                 | 27 (6.08)                   | .77            | 1.12 (0.53, 2.37)  | Not sufficient for viral myocarditis    |
| Myocardium: few fatty infiltration       | 17 (11.50)                | 29 (6.53)                   | .05            | 1.86 (0.99, 3.49)  | Not sufficient for cardiomyopathy       |
| Coronary artery: atherosclerosis         | 3 (2.03)                  | 14 (3.15)                   | .67            | 0.64 (0.18, 2.24)  | The stenosis of coronary artery <20%    |
| CCS: few lymphocytic infiltration        | 3 (2.03)                  | 4 (0.90)                    | .51            | 2.28 (0.50, 1.03)  | Not sufficient for viral myocarditis    |
| CCS: few fatty infiltration              | 12 (8.11)                 | 15 (3.38)                   | .02            | 2.52 (1.15, 5.52)  | Not sufficient for cardiomyopathy       |
| CCS: slight stenosis of artery           | 5 (3.38)                  | 4 (0.90)                    | .08            | 3.85 (1.02, 14.52) | The stenosis of artery <20%             |
| Brain: neuronc amyloidosis               | 3 (2.03)                  | 5 (1.13)                    | .68            | 1.82 (0.43, 7.70)  |                                         |
| Lung: adhesion between lobes of lung     | 18 (12.16)                | 59 (13.29)                  | .72            | 0.90 (0.51, 1.59)  |                                         |
| Liver: fatty degeneration of hepatocytes | 42 (28.38)                | 94 (21.17)                  | .07            | 1.48 (0.97, 2.25)  | Slight degeneration                     |
| Kidney: sporadic glomerulosclerosis      | 10 (6.76)                 | 31 (6.98)                   | .93            | 0.97 (0.46, 2.02)  | 1-3 glomerulosclerosis per kidney slice |
| Spleen: hyalinosis of central artery     | 12 (8.11)                 | 17 (3.83)                   | .04            | 2.22 (1.03, 4.76)  |                                         |
| Pancreas: hemorrhage without necrosis    | 3 (2.03)                  | 8 (1.80)                    | 1.0            | 1.13 (0.30, 4.31)  | No inflammatory cell infiltration       |
| Thymus: remain unwithered                | 73 (49.32)                | 81 (18.24)                  | <.001          | 4.36 (2.92, 6.52)  | >40% area not be replaced with fat      |

<sup>a</sup>CCS = cardiac conduction system including the area of sinus node, atrio-ventricular node, and His bundle.

**Supplemental Table 3. The age, height, heart structure, and the genetic findings in 44 SUNDS cases<sup>a</sup>**

| Group          | n  | Age (years) | Height (cm) | Heart weight (g) | LV Thickness (cm) | RV thickness (cm) | Tricuspid valve (cm) | Pulmonary valve (cm) | Mitral valve (cm) | Aortic valve (cm) |
|----------------|----|-------------|-------------|------------------|-------------------|-------------------|----------------------|----------------------|-------------------|-------------------|
| SUNDS          | 44 | 30.23± 8.00 | 169.05±6.61 | 364.78±67.15     | 1.22±0.18         | 0.32±0.07         | 11.80±0.96           | 7.87±0.83            | 9.42±1.07         | 6.99±0.79         |
| A (+)          | 12 | 31.83±8.83  | 168.90±6.08 | 358.00±65.63     | 1.22±0.20         | 0.30±0.08         | 11.92±0.80           | 8.12±0.82            | 9.73±0.73         | 7.18±0.44         |
| A (-)          | 32 | 29.63±7.74  | 169.11±6.90 | 367.30±68.77     | 1.21±0.17         | 0.33±0.06         | 11.76±1.02           | 7.77±0.83            | 9.31±1.16         | 6.92±0.88         |
| <i>P</i> value |    | .42         | .93         | .71              | .94               | .24               | .66                  | .26                  | .29               | .38               |
| C (+)          | 14 | 26.21±8.58  | 168.25±6.69 | 342.75±62.05     | 1.23±0.19         | 0.34±0.08         | 11.56±0.89           | 7.28±0.84            | 9.05±1.09         | 6.46±0.86         |
| C (-)          | 30 | 32.10±7.12  | 169.44±6.67 | 375.36±68.12     | 1.21±0.18         | 0.31±0.06         | 11.92±0.99           | 8.15±0.67            | 9.60±1.03         | 7.25±0.61         |
| <i>P</i> value |    | .02         | .62         | .17              | .84               | .21               | .29                  | .002                 | .15               | .003              |
| A(+)/C(+)      | 22 | 28.77±8.76  | 168.05±6.62 | 349.11±67.61     | 1.21±0.20         | 0.32±0.08         | 11.67±0.90           | 7.73±0.96            | 9.27±1.00         | 6.79±0.84         |
| A(-)C(-)       | 22 | 31.68±7.08  | 170.11±6.61 | 381.33±64.38     | 1.22±0.16         | 0.33±0.06         | 11.94±1.03           | 8.01±0.65            | 9.58±1.15         | 7.21±0.69         |
| <i>P</i> value |    | .23         | .35         | .15              | .85               | .60               | .39                  | .31                  | .38               | .11               |

<sup>a</sup>A(+/-), C(+/-) refer to SUNDS cases with (+) /without (-) rare variants in primary arrhythmia (A) or caridomyopathy (C) associated genes;

A(+)/C(+) = A(+) or C(+); A(-) C(-) = neither A(+) nor C(+); LV = left ventricle; RV = right ventricle.

## Online-Only Text

### **Methods**

Some of the molecular/functional lines of evidence for pathogenicity that were assessed included whether the variant: (1) was a null variant (nonsense, frame-shift, canonical splice sites) in a gene where loss-of-function is a known mechanism of disease, (2) involved the same amino acid change as a previously established pathogenic variant regardless of nucleotide change, (3) was associated with a well-established in vitro or in vivo functional studies supportive of a damaging effect on the gene or gene product, (4) was located in a mutational hot spot and/or critical and well-established functional domain without benign variation, (5) was a novel missense change at an amino acid residue where a different missense change determined to be pathogenic has been seen before, and (6) had multiple lines of computational evidence supporting a deleterious effect on the gene or gene product.

## Online-Only References

1. Samani K, Wu G, Ai T, Shuraih M, Mathuria NS, Li Z, Sohma Y, Purevjav E, Xi Y, Towbin JA, Cheng J, Vatta M. A novel SCN5A mutation V1340I in Brugada syndrome augmenting arrhythmias during febrile illness. *Heart Rhythm*. 2009;6(9):1318-1326.
2. Song L, Zou Y, Wang J, Wang Z, Zhen Y, Lou K, Zhang Q, Wang X, Wang H, Li J, Hui R. Mutations profile in Chinese patients with hypertrophic cardiomyopathy. *Clin Chim Acta*. 2005;351(1-2):209-216.
3. Yang Z, Bowles NE, Scherer SE, Taylor MD, Kearney DL, Ge S, Nadvoretzkiy VV, DeFreitas G, Carabello B, Brandon LI, Godsel LM, Green KJ, Saffitz JE, Li H, Danieli GA, Calkins H, Marcus F, Towbin JA. Desmosomal dysfunction due to mutations in desmoplakin causes arrhythmogenic right ventricular dysplasia/cardiomyopathy. *Circ Res*. 2006;99(6):646-655.
4. Taylor MR, Fain PR, Sinagra G, Robinson ML, Robertson AD, Carniel E, Di Lenarda A, Bohlmeier TJ, Ferguson DA, Brodsky GL, Boucek MM, Lascor J, Moss AC, Li WL, Stetler GL, Muntoni F, Bristow MR, Mestroni L; Familial Dilated Cardiomyopathy Registry Research Group. Natural history of dilated cardiomyopathy due to lamin A/C gene mutations. *J Am Coll Cardiol*. 2003;41(5):771-780.
5. Lanktree M, Cao H, Rabkin SW, Hanna A, Hegele RA. Novel LMNA mutations seen in patients with familial partial lipodystrophy subtype 2 (FPLD2; MIM 151660). *Clin Genet*. 2007;71(2):183-186.
6. Van Esch H, Agarwal AK, Debeer P, Fryns JP, Garg A. A homozygous mutation in the lamin A/C gene associated with a novel syndrome of arthropathy, tendinous calcinosis, and progeroid features. *J Clin Endocrinol Metab*. 2006;91(2):517-521.
7. Morisaki H, Higuchi I, Abe M, Osame M, Morisaki T. First missense mutations (R388W and R425H) of AMPD1 accompanied with myopathy found in a Japanese patient. *Hum Mutat*. 2000;16(6):467-472.
8. Liang L, Du ZD, Cai LL, Wu JX, Zheng T, Qi TX. A novel KCNQ1 mutation in Chinese with congenital long QT syndrome (in Chinese). *Zhonghua Er Ke Za Zhi*. 2003;41(10):724-727.
9. Liu C, Tester DJ, Hou Y, Wang W, Lv G, Ackerman MJ, Makielski JC, Cheng J. Is sudden unexplained nocturnal death syndrome in Southern China a cardiac sodium channel dysfunction disorder? *Forensic Sci Int*. 2014;236:38-45.
10. Tani S, Hayashi K, Ino H, Fujino N, Tsuda T, Takamura M. Impact of gain-of-function gene variant of scn1b t189m, on occurrence of lone atrial fibrillation. *Journal of Arrhythmia*. 2011;

27(supl): OP18\_14.

11. Berge KE, Leren TP. Genetics of hypertrophic cardiomyopathy in Norway. *Clin Genet*. 2014; 86(4): 355-360.

12. Kapplinger JD, Tester DJ, Salisbury BA, Carr JL, Harris-Kerr C, Pollevick GD, Wilde AA, Ackerman MJ. Spectrum and prevalence of mutations from the first 2,500 consecutive unrelated patients referred for the FAMILION long QT syndrome genetic test. *Heart Rhythm*. 2009;6(9):1297-1303.

13. Mook OR, Haagmans MA, Soucy JF, van de Meerakker JB, Baas F, Jakobs ME, Hofman N, Christiaans I, Lekanne Deprez RH, Mannens MM. Targeted sequence capture and GS-FLX Titanium sequencing of 23 hypertrophic and dilated cardiomyopathy genes: implementation into diagnostics. *J Med Genet*. 2013;50(9):614-626.

14. Richard P, Charron P, Carrier L, Ledeuil C, Cheav T, Pichereau C, Benaiche A, Isnard R, Dubourg O, Burbani M, Gueffet JP, Millaire A, Desnos M, Schwartz K, Hainque B, Komajda M; EUROGENE Heart Failure Project. Hypertrophic cardiomyopathy: distribution of disease genes, spectrum of mutations, and implications for a molecular diagnosis strategy. *Circulation*. 2003;107(17):2227-2232.

15. Miliou A, Anastasakis A, D'Cruz LG, Theopistou A, Rigopoulos A, Rizos I, Stamatelopoulos S, Toutouzas P, Stefanadis C. Low prevalence of cardiac troponin T mutations in a Greek hypertrophic cardiomyopathy cohort. *Heart*. 2005;91(7):966-967.

16. Zhou D, Guo H, Bai Y, Chi L. Genetic analysis of a spinocerebellar ataxia family combined with atrial septal defects. *Journal of Third Military Medical University*. 2013; 11: 037.

17. Makita N, Behr E, Shimizu W, Horie M, Sunami A, Crotti L, Schulze-Bahr E, Fukuhara S, Mochizuki N, Makiyama T, Itoh H, Christiansen M, McKeown P, Miyamoto K, Kamakura S, Tsutsui H, Schwartz PJ, George AL Jr, Roden DM. The E1784K mutation in SCN5A is associated with mixed clinical phenotype of type 3 long QT syndrome. *J Clin Invest*. 2008;118(6):2219-2229.

18. Hu D, Viskin S, Oliva A, Carrier T, Cordeiro JM, Barajas-Martinez H, Wu Y, Burashnikov E, Sicouri S, Brugada R, Rosso R, Guerchicoff A, Pollevick GD, Antzelevitch C. Novel mutation in the SCN5A gene associated with arrhythmic storm development during acute myocardial infarction. *Heart Rhythm*. 2007;4(8):1072-1080.

19. McNair WP, Ku L, Taylor MR, Fain PR, Dao D, Wolfel E, Mestroni L; Familial Cardiomyopathy Registry Research Group. SCN5A mutation associated with dilated cardiomyopathy, conduction disorder, and arrhythmia. *Circulation*. 2004;110(15):2163-2167.

20. Laitinen-Forsblom PJ, Mäkynen P, Mäkynen H, Yli-Mäyry S, Virtanen V, Kontula K, Aalto-Setälä K. SCN5A mutation associated with cardiac conduction defect and atrial arrhythmias. *J Cardiovasc Electrophysiol.* 2006;17(5):480-485.
21. Yoshikane Y1, Yoshinaga M, Hamamoto K, Hirose S. A case of long QT syndrome with triple gene abnormalities: digenic mutations in KCNH2 and SCN5A and gene variant in KCNE1. *Heart Rhythm.* 2013;10(4):600-603.
22. Sommariva E, Pappone C, Martinelli Boneschi F, Di Resta C, Rosaria Carbone M, Salvi E, Vergara P, Sala S, Cusi D, Ferrari M, Benedetti S. Genetics can contribute to the prognosis of Brugada syndrome: a pilot model for risk stratification. *Eur J Hum Genet.* 2013;21(9):911-917.
23. Christensen AH, Benn M, Bundgaard H, Tybjaerg-Hansen A, Haunso S, Svendsen JH. Wide spectrum of desmosomal mutations in Danish patients with arrhythmogenic right ventricular cardiomyopathy. *J Med Genet.* 2010;47(11):736-744.
24. Zou Y, Wang J, Wu P. Ala26Val mutation in beta myosin heavy chain gene: a hot spot mutation in Chinese hypertrophic cardiomyopathy (in Chinese). *Zhonghua xin xue guan bing za zhi.* 2001; 30: 473-476.
25. Liu SX, Hu SJ, Sun J, Wang J, Wang XT, Jiang Y, Cai J. Characteristics of the beta myosin heavy chain gene Ala26Val mutation in a Chinese family with hypertrophic cardiomyopathy. *Eur J Intern Med.* 2005;16(5):328-333.
